# Supplementary material
Source: publisher figshare collection journal article supplement (https://sage.figshare.com/ndownloader/files/36374680)
Supplement: Supplementary file 1 [file 36374680]

| Variable<br>Condition<br>Counting | Mediolateral body sway (cm) |       |             |       |             |       |             |       |
|-----------------------------------|-----------------------------|-------|-------------|-------|-------------|-------|-------------|-------|
|                                   | Eyes open                   |       | Eyes closed |       | Eyes closed |       | Eyes closed |       |
|                                   | Forward                     |       | Forward     |       | Backward    |       | Backward ^3 |       |
| Group                             | L/M                         | H     | L/M         | H     | L/M         | H     | L/M         | H     |
| Min                               | 7.48                        | 11.30 | 9.16        | 9.65  | 8.25        | 13.52 | 8.14        | 13.08 |
| 25th                              | 12.48                       | 14.49 | 16.51       | 19.16 | 16.26       | 20.60 | 17.42       | 18.39 |
| Median                            | 16.47                       | 16.27 | 21.04       | 26.00 | 24.06       | 25.17 | 21.16       | 20.34 |
| 75th                              | 21.72                       | 18.27 | 32.65       | 29.06 | 31.66       | 27.47 | 32.67       | 22.84 |
| Maximum                           | 55.45                       | 20.98 | 74.88       | 39.20 | 52.20       | 81.20 | 58.07       | 36.81 |
| Mean                              | 18.38                       | 16.30 | 25.37       | 24.66 | 24.80       | 30.01 | 25.13       | 21.98 |
| SD                                | 8.78                        | 3.57  | 13.05       | 8.95  | 10.02       | 20.14 | 11.50       | 6.66  |

| Variable<br>Condition<br>Counting | Anteroposterior body sway (cm) |       |             |       |             |       |             |       |
|-----------------------------------|--------------------------------|-------|-------------|-------|-------------|-------|-------------|-------|
|                                   | Eyes open                      |       | Eyes closed |       | Eyes closed |       | Eyes closed |       |
|                                   | Forward                        |       | Forward     |       | Backward    |       | Backward ^3 |       |
| Group                             | L/M                            | H     | L/M         | H     | L/M         | H     | L/M         | H     |
| Min                               | 12.19                          | 13.81 | 15.19       | 23.11 | 12.38       | 17.28 | 9.46        | 19.65 |
| 25th                              | 19.84                          | 20.69 | 21.16       | 25.34 | 24.08       | 21.95 | 21.35       | 25.81 |
| Median                            | 23.81                          | 22.13 | 26.91       | 27.20 | 29.55       | 27.59 | 30.03       | 32.03 |
| 75th                              | 29.45                          | 30.34 | 36.41       | 29.74 | 39.62       | 35.79 | 37.08       | 33.09 |
| Maximum                           | 71.51                          | 53.88 | 106.62      | 33.15 | 73.20       | 72.19 | 96.58       | 41.25 |
| Mean                              | 26.10                          | 27.78 | 32.51       | 27.72 | 33.14       | 33.31 | 32.41       | 29.61 |
| SD                                | 11.14                          | 12.10 | 17.51       | 3.54  | 13.71       | 17.28 | 16.18       | 7.08  |

| Variable<br>Condition<br>Counting | Mediolateral Velocity (cm/s) |      |             |       |             |       |             |       |
|-----------------------------------|------------------------------|------|-------------|-------|-------------|-------|-------------|-------|
|                                   | Eyes open                    |      | Eyes closed |       | Eyes closed |       | Eyes closed |       |
|                                   | Forward                      |      | Forward     |       | Backward    |       | Backward ^3 |       |
| Group                             | L/M                          | H    | L/M         | H     | L/M         | H     | L/M         | H     |
| Min                               | 3.18                         | 3.68 | 4.43        | 4.54  | 4.05        | 6.22  | 3.95        | 6.16  |
| 25th                              | 4.82                         | 5.80 | 6.27        | 8.43  | 6.80        | 7.25  | 6.97        | 7.33  |
| Median                            | 6.11                         | 6.69 | 9.17        | 10.01 | 9.31        | 10.83 | 8.72        | 7.65  |
| 75th                              | 8.91                         | 8.61 | 13.52       | 12.93 | 13.65       | 14.44 | 11.95       | 12.50 |
| Maximum                           | 22.10                        | 9.96 | 30.25       | 15.96 | 28.15       | 24.46 | 31.12       | 18.31 |
| Mean                              | 7.40                         | 6.93 | 10.63       | 10.32 | 10.59       | 12.12 | 10.03       | 9.91  |
| SD                                | 3.68                         | 1.92 | 5.49        | 3.83  | 5.01        | 6.44  | 4.76        | 4.30  |

| Variable  | Anterioposterior Velocity (cm/s) |       |             |       |             |       |             |       |
|-----------|----------------------------------|-------|-------------|-------|-------------|-------|-------------|-------|
| Condition | Eyes open                        |       | Eyes closed |       | Eyes closed |       | Eyes closed |       |
| Counting  | Forward                          |       | Forward     |       | Backward    |       | Backward ^3 |       |
| Group     | L/M                              | H     | L/M         | H     | L/M         | H     | L/M         | H     |
| Min       | 4.38                             | 4.90  | 4.54        | 8.27  | 4.80        | 7.20  | 3.85        | 7.48  |
| 25th      | 5.71                             | 7.03  | 7.92        | 9.14  | 8.67        | 10.04 | 8.69        | 8.06  |
| Median    | 6.82                             | 7.37  | 10.00       | 11.06 | 10.89       | 11.05 | 10.08       | 10.54 |
| 75th      | 10.25                            | 8.38  | 14.96       | 12.00 | 16.95       | 13.70 | 15.80       | 11.66 |
| Maximum   | 28.05                            | 11.08 | 36.40       | 15.14 | 42.87       | 24.20 | 47.89       | 15.95 |
| Mean      | 8.70                             | 7.77  | 12.44       | 11.05 | 13.25       | 12.25 | 12.70       | 10.71 |
| SD        | 4.77                             | 1.99  | 6.73        | 2.30  | 6.97        | 4.96  | 7.14        | 3.25  |

| Variable  | COP Area (cm^2) |        |             |        |             |         |             |        |
|-----------|-----------------|--------|-------------|--------|-------------|---------|-------------|--------|
| Condition | Eyes open       |        | Eyes closed |        | Eyes closed |         | Eyes closed |        |
| Counting  | Forward         |        | Forward     |        | Backward    |         | Backward ^3 |        |
| Group     | L/M             | H      | L/M         | H      | L/M         | H       | L/M         | H      |
| Min       | 110.02          | 136.10 | 136.98      | 193.91 | 77.48       | 212.30  | 60.24       | 213.83 |
| 25th      | 187.06          | 227.28 | 244.98      | 364.01 | 284.32      | 299.94  | 292.37      | 347.36 |
| Median    | 283.97          | 253.35 | 434.35      | 492.60 | 508.93      | 399.29  | 436.79      | 435.25 |
| 75th      | 446.02          | 434.16 | 704.74      | 583.05 | 772.09      | 649.04  | 712.90      | 605.68 |
| Maximum   | 2333.53         | 588.98 | 1735.85     | 861.92 | 2881.93     | 2656.08 | 3646.29     | 838.14 |
| Mean      | 368.12          | 326.91 | 524.97      | 488.20 | 621.25      | 677.31  | 612.07      | 477.87 |
| SD        | 347.94          | 153.72 | 357.83      | 219.69 | 509.29      | 761.47  | 584.03      | 213.77 |
